# Supplementary material
Source: PubMed Central journal article supplement (PMC4342287)
Supplement: NIHMS639474-supplement-Supp_FigureS1-S3.pdf [file NIHMS639474-supplement-Supp_FigureS1-S3.pdf]

***New Phytologist* Supporting Information**

Article title: **Homologous recombination and retention of a single form of most genes shape the highly chimeric mitochondrial genome of a cybrid plant**

Authors: M. Virginia Sanchez-Puerta, Mikhailo K. Zubko and Jeffrey D. Palmer

Article acceptance date: 14 October 2014

The following Supporting Information is available for this article:

**Fig. S1** Dot-plot comparisons of mitochondrial genomes.

**Fig. S2** Total read depth of the cybrid Nt(+Hn) mitochondrial contigs.

**Fig. S3** Partial nucleotide sequence of the cybrid *cox1* gene cDNA.

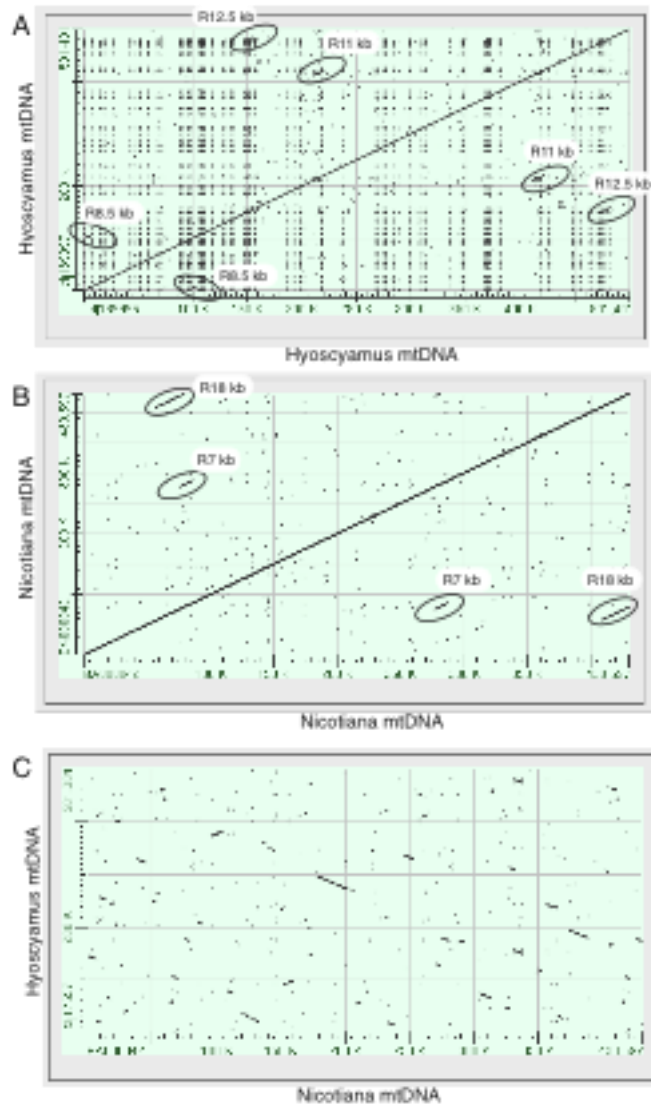

**Fig. S1** Dot-plot comparisons of mitochondrial genomes. (A–C) Self-self dot-plot analysis of the mitochondrial genomes of *H. niger* (A) and *N. tabacum* (B), conducted to visualize repeats (ovals surround the largest repeats, which are labeled by ‘R’, followed by their lengths in kb). (C) Dot-plot comparison of the mitochondrial genomes of *H. niger* and *N. tabacum*, conducted to visualize regions of shared synteny.

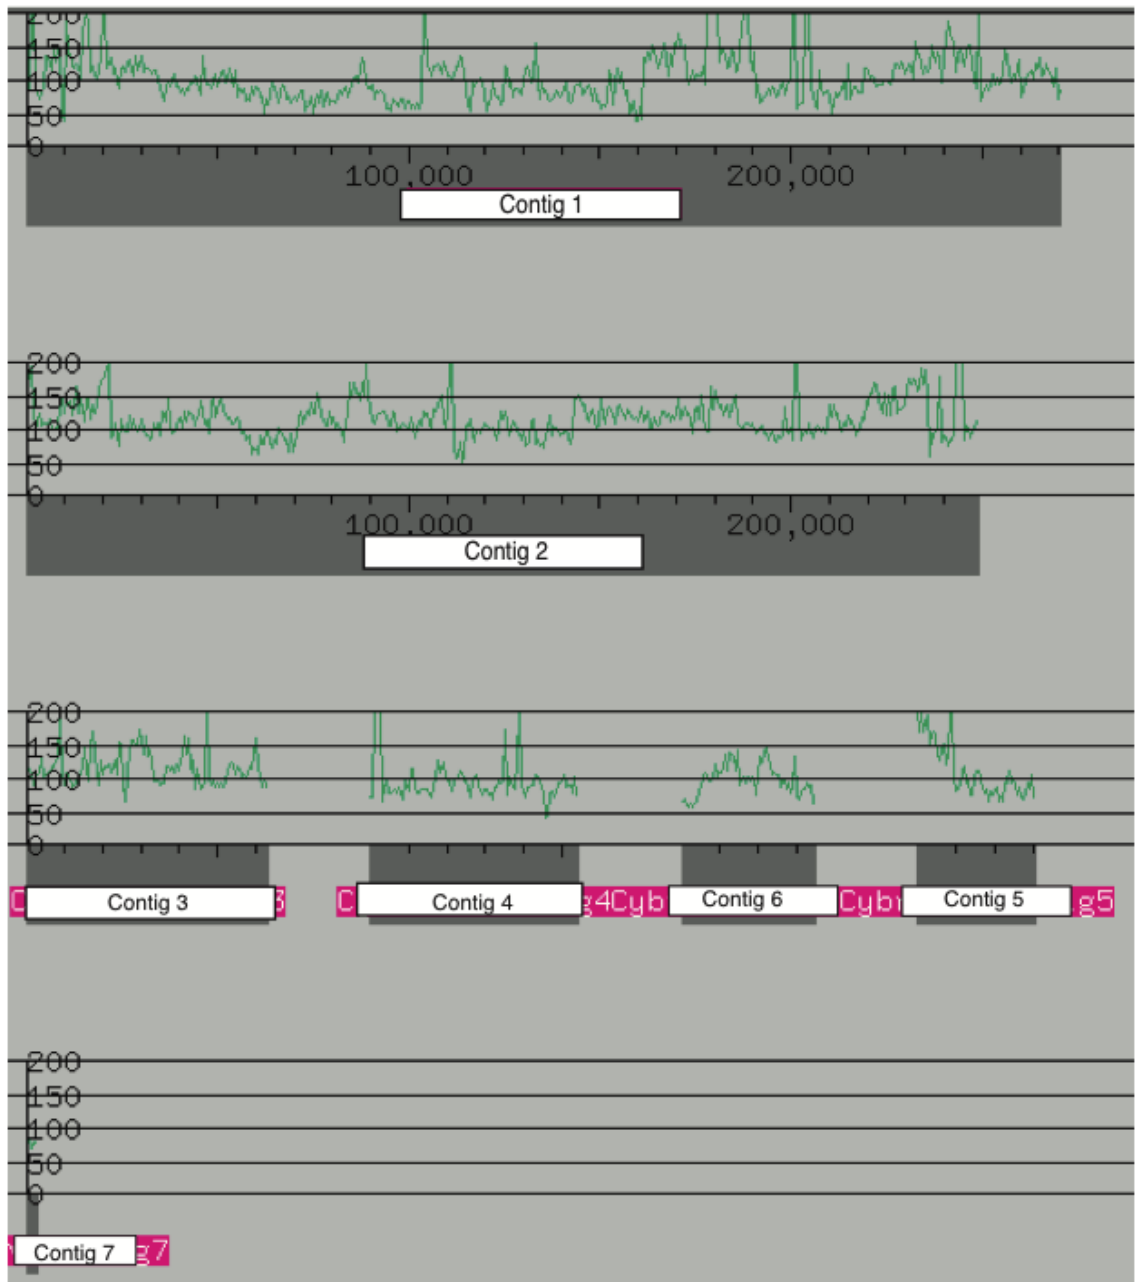

**Fig. S2** Total read depth of the cybrid Nt(+Hn) mitochondrial contigs. A total of ~ 780,000 reads matched the mitochondrial assembly. The average total read depth was 107 reads.

TAGCAATTTTAGTCTTCATCTATCTGGTGTTTCATCCATTTTAGGTTCTAT  
E  
TAATTTTATAACAACCTATCTTCAACATGCGTGGACCTGGAATGACTATGCAT  
AGATTACCTCTATTTGTGTGGTCCGTTCTAGTGACAGCATTCCTACTTTTAT  
E E  
TATCACTTCCGGTACTGGCAGGGGCAATTACCATGTTATTAACCGATCGAAA  
CTTTAATAACAACCTTTTGTGATCCCCTGGAGGGGGAGACCCCATATTATAC  
E  
CAGCATCTCTTTTGGTCTTCGGTCACCCTGAAGTTACATCCTCATTCTAC  
▲ CCT  
CTGGATTCCGGTATCATAAGTCATATCGTTTCGACTTTTTTCGGGAAAACCGGT  
TTTCGGGTATCTAGGCATGGTTTATGCCATGATCAGTATAGGTGTTCTTGGA  
TTTCTTGTTTGGGCTCATCATATGTTTACTGTGGGCTTAGACGTTGATACCC  
GTGCCTACTTCACCGCAGCTACCATGATCATAGCTGTCCCCACTGGAATCAA  
AATCTTTAGTTGGATCGCTACCATGTGGGGGGTTCGATAACAATAAAAACA  
CCCATGTTATTTGCTGTAGGGTTCATCTTTTTGTTACCATAGGAGGACTCA  
CTGGAATAGTTCTGGCTAATTCTGGGCTA

**Fig. S3** Partial nucleotide sequence of the cybrid *cox1* gene cDNA. RNA edited sites are in red and marked with the letter 'E' below them. Sites corresponding to the co-conversion tract (CCT) are in green and underlined. The intron has been spliced out and the intron insertion site is indicated with an arrowhead.
